# Supplementary material for: Psychometric properties of a self-assessment questionnaire concerning symptoms and impairment in urinary tract infections: the UTI-SIQ-8
Source: PubMed Central journal article supplement — BMJ Open. 2021 Feb 15;11(2):e043328. doi: 10.1136/bmjopen-2020-043328 (PMC7887375; doi:10.1136/bmjopen-2020-043328), 2021-02-15
Supplement: bmjopen-2020-043328supp001.pdf [file bmjopen-2020-043328supp001.pdf]

**Appendix 1****The UTI-SIQ-8 (in German and English translation)**

Pat. Code

**Patientenfragebogen**

Bei den folgenden 8 Fragen geht es darum, wie stark Ihre Beschwerden **heute** sind bzw. wie stark Sie sich **heute** durch Ihre Beschwerden beeinträchtigt fühlen.

Bitte kreuzen Sie pro Zeile **ein** Kästchen an

| Wie stark sind Ihre Beschwerden <b>heute</b> ? | gar nicht                | ein wenig                | mäßig                    | stark                    | sehr stark               |
|------------------------------------------------|--------------------------|--------------------------|--------------------------|--------------------------|--------------------------|
|                                                | 0                        | 1                        | 2                        | 3                        | 4                        |
| 1. Harndrang                                   | <input type="checkbox"/> |
| 2. Schmerzen beim Wasserlassen                 | <input type="checkbox"/> |
| 3. Häufiges Wasserlassen                       | <input type="checkbox"/> |
| 4. Schmerzen im Unterbauch                     | <input type="checkbox"/> |

| Wie stark fühlen Sie sich <b>heute</b> durch Ihre Beschwerden beeinträchtigt? | gar nicht                | ein wenig                | mäßig                    | stark                    | sehr stark               |
|-------------------------------------------------------------------------------|--------------------------|--------------------------|--------------------------|--------------------------|--------------------------|
|                                                                               | 0                        | 1                        | 2                        | 3                        | 4                        |
| 5. Beeinträchtigung durch den Harndrang                                       | <input type="checkbox"/> |
| 6. Beeinträchtigung durch Schmerzen beim Wasserlassen                         | <input type="checkbox"/> |
| 7. Beeinträchtigung durch häufiges Wasserlassen                               | <input type="checkbox"/> |
| 8. Beeinträchtigung durch Schmerzen im Unterbauch                             | <input type="checkbox"/> |

Pat. Code

2

## Patient questionnaire

Please indicate whether you have had the following symptoms/problems **today** and how severe they were **today**.

Please check only **one** box per line.

| How severe are your symptoms <b>today</b> ? | not at all               | Mild                     | moderate                 | strong                   | very strong              |
|---------------------------------------------|--------------------------|--------------------------|--------------------------|--------------------------|--------------------------|
|                                             | 0                        | 1                        | 2                        | 3                        | 4                        |
| 1. Urgency of urination                     | <input type="checkbox"/> |
| 2. Pain or burning when passing urine       | <input type="checkbox"/> |
| 3. Frequency of urination                   | <input type="checkbox"/> |
| 4. Pain in the lower abdomen                | <input type="checkbox"/> |

| How much impairing are the symptoms for you <b>today</b> ? | not at all               | Little                   | moderate                 | severe                   | very severe              |
|------------------------------------------------------------|--------------------------|--------------------------|--------------------------|--------------------------|--------------------------|
|                                                            | 0                        | 1                        | 2                        | 3                        | 4                        |
| 5. Impaired activities due to urgency                      | <input type="checkbox"/> |
| 6. Impaired activities due to pain while passing urine     | <input type="checkbox"/> |
| 7. Impaired activities due to frequency of urination       | <input type="checkbox"/> |
| 8. Impaired activities due to pain in the lower abdomen    | <input type="checkbox"/> |

## Appendix 2

### Examples of the electronic version of the UTI-SIQ-8 (via tablet or smartphone)

#### Start screen

Participants have to sign up with an individual registration code.

UNIVERSITÄTSMEDIZIN GÖTTINGEN UMG

Institut für Allgemeinmedizin

Der natürliche Verlauf des unkomplizierten Harnwegsinfektes

Eine Beobachtungsstudie in Praxen für Allgemeinmedizin und für Frauenheilkunde und Geburtshilfe

Herzlichen Willkommen und vielen Dank für Ihre Bereitschaft, bei dieser Studie mitzuwirken.

Bitte geben Sie die Teilnehmernummer ein, die Sie zusammen mit den Studienunterlagen von Ihrem Arzt erhalten haben.

Teilnehmernummer  **Anmelden**

[Kontakt](#)

Institut für Allgemeinmedizin  
Studienleitung Dr med. Inke Gágyor  
Humboldtallee 38  
37073 Göttingen  
Tel: 0551 / 39-22638

#### Registry

Users can provide personal information on a voluntary basis for a telephone conversation and a daily reminder.

UNIVERSITÄTSMEDIZIN GÖTTINGEN UMG

Institut für Allgemeinmedizin

Registrierung

Die Angabe von Ihrem Namen ist **freiwillig**. Er wird lediglich zur Personalisierung von E-Mails und SMS verwendet und um Sie bei einem Telefongespräch persönlich ansprechen zu können.

Vorname

Nachname

Die Angabe einer E-Mail-Adresse ist **freiwillig**. Das Studiendesign sieht vor, dass während der Zeit, in der Einträge im Tagebuch gemacht werden sollen, täglich eine Erinnerung über E-Mail und/oder SMS erfolgt. Wenn Sie eine Erinnerung über E-Mail wünschen, müssen Sie hier eine E-Mail-Adresse angeben.

E-Mail-Adresse

Die Angabe mindestens einer Telefonnummer ist **notwendig**. Wir werden Sie vier Wochen nach Beginn des Tagebuchs einmalig zu einer Abschlussbefragung telefonisch kontaktieren. Wenn Sie die Erinnerungen zu den Tagebucheinträgen über SMS erhalten wollen, ist die Angabe einer Mobilnummer notwendig.

Festnetz (mit Vorwahl)

Mobiltelefon

Wollen Sie die Erinnerungen zu den Tagebucheinträgen über E-Mail oder SMS erhalten?

E-Mail  SMS  E-Mail & SMS

**Im System registrieren**

[Zurück zur Anmeldeseite](#)

## Welcome

Participants are welcomed and informed about the time schedule of the study. Data protection is emphasized.



UNIVERSITÄTSMEDIZIN GÖTTINGEN UMG

Institut für Allgemeinmedizin

**Der natürliche Verlauf des unkomplizierten Harnwegsinfektes**

Eine Beobachtungsstudie in Praxen für Allgemeinmedizin und für Frauenheilkunde und Geburtshilfe

Herzlich Willkommen Erika Musterfrau.

Wir freuen uns, dass Sie bereit sind, am Projekt des Instituts für Allgemeinmedizin der Universitätsmedizin Göttingen teilzunehmen.

Im Rahmen der Studie werden wir Sie über 8 Tage täglich an die Eintragungen in diesem „elektronischen Tagebuch“ erinnern.

**Heute, am ersten Tag, sind die Fragebogen zur Datenerhebung einmalig etwas umfangreicher.**

In 4 Wochen werden wir Sie noch einmal telefonisch kontaktieren, um Sie zu fragen, ob Sie sich vollständig erholt haben oder zwischenzeitlich wegen anhaltender oder wiederkehrender Beschwerden einen Arzt aufsuchen mussten.

**Alle erhobenen Daten werden anonymisiert in der Datenbank gespeichert, damit keine Zuordnung zu Ihrer Person erfolgen kann.**

[Weiter zum Tagebuch](#)

## Initial assessment

Participants are asked for an initial assessment regarding symptom duration, urine quality, fever, etc.

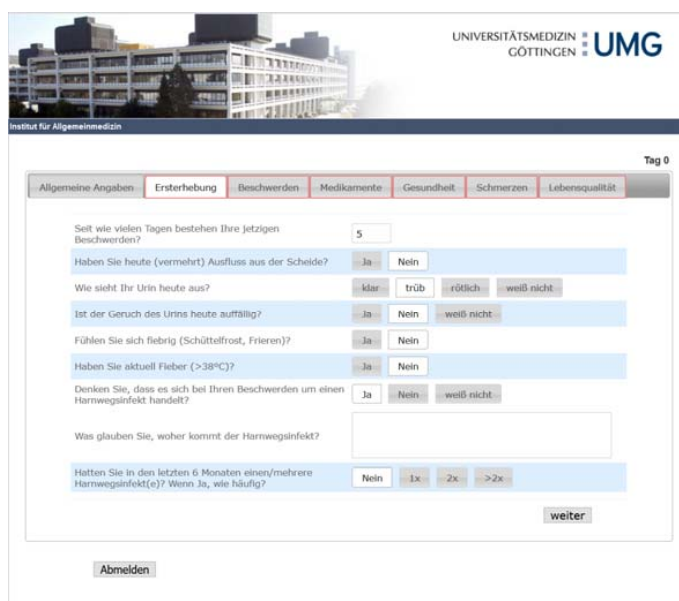

UNIVERSITÄTSMEDIZIN GÖTTINGEN UMG

Institut für Allgemeinmedizin

Tag 0

Allgemeine Angaben | **Ersterhebung** | Beschwerden | Medikamente | Gesundheit | Schmerzen | Lebensqualität

Seit wie vielen Tagen bestehen Ihre jetzigen Beschwerden?

Haben Sie heute (vermehrt) Ausfluss aus der Scheide?

Wie sieht Ihr Urin heute aus?

Ist der Geruch des Urins heute auffällig?

Fühlen Sie sich fiebrig (Schüttelfrost, Frieren)?

Haben Sie aktuell Fieber (>38°C)?

Denken Sie, dass es sich bei Ihren Beschwerden um einen Harnwegsinfekt handelt?

Was glauben Sie, woher kommt der Harnwegsinfekt?

Hatten Sie in den letzten 6 Monaten einen/mehrere Harnwegsinfekt(e)? Wenn Ja, wie häufig?

[weiter](#)

[Abmelden](#)

## EQ-5D-5L (excerpt)

Participants evaluate their current state of health (only for the validation study)

**Schmerzen / Körperliche Beschwerden**

Ich habe keine Schmerzen oder Beschwerden

Ich habe leichte Schmerzen oder Beschwerden

Ich habe mäßige Schmerzen oder Beschwerden

Ich habe starke Schmerzen oder Beschwerden

Ich habe extreme Schmerzen oder Beschwerden

**Angst / Niedergeschlagenheit**

Ich bin nicht ängstlich oder deprimiert

Ich bin ein wenig ängstlich oder deprimiert

Ich bin mäßig ängstlich oder deprimiert

Ich bin sehr ängstlich ängstlich oder deprimiert

Ich bin extrem ängstlich oder deprimiert

Wir wollen heraus finden, wie Sie Ihren Gesundheitszustand **HEUTE** einschätzen.  
Diese Skala ist mit Zahlen von 0 bis 100 versehen.  
**0 (Null)** ist die schlechteste Gesundheit, die Sie sich vorstellen können.  
**100** ist die beste Gesundheit, die Sie sich vorstellen können.  
Bitte stellen Sie den Punkt auf der Skala ein, der Ihre Gesundheit **HEUTE** am besten beschreibt.

0 5 10 15 20 25 30 35 40 45 50 55 60 65 70 75 80 85 90 95 100

Ihre Gesundheit heute =

[weiter](#)

[Abmelden](#)

## Visual analog scale

Participants assess pain intensity on a scale of 0 to 10 (only for the validation study)

UNIVERSITÄTSMEDIZIN GÖTTINGEN UMG

Institut für Allgemeinmedizin

Tag 0

Allgemeine Angaben Ersterhebung Beschwerden Medikamente Gesundheit Schmerzen Lebensqualität

**Erfassung Ihrer Schmerzen anhand einer Schmerzskala**

Schmerzepfinden ist hochgradig individuell. Um Ihre Schmerzen erfassen zu können, nutzen wir eine stufenlose Schmerzskala, die von 0 (= keine Schmerzen) bis 10 (= stärkste vorstellbare Schmerzen) reicht.  
Bitte stellen Sie den Punkt auf der Skala ein, der Ihre gefühlten Schmerzen **HEUTE** am besten beschreibt. Sie können auch auf die Grafik klicken, um den Schieberegler zu bewegen.

keine Schmerzen  stärkste vorstellbare Schmerzen

0 1 2 3 4 5 6 7 8 9 10

[weiter](#)

[Abmelden](#)

## UTI-SIQ-8

Participants evaluate severity of symptoms and impairment

UNIVERSITÄTSMEDIZIN GÖTTINGEN UMG  
Institut für Allgemeinmedizin

Tag 0

Allgemeine Angaben Ersterhebung **Beschwerden** Medikamente Gesundheit Schmerzen Lebensqualität

Wie stark ausgeprägt sind Ihre Beschwerden heute?

|                                     | 0         | 1         | 2     | 3     | 4          |
|-------------------------------------|-----------|-----------|-------|-------|------------|
| Harndrang                           | gar nicht | ein wenig | mäßig | stark | sehr stark |
| Brennen/Schmerzen beim Wasserlassen | gar nicht | ein wenig | mäßig | stark | sehr stark |
| Häufiges Wasserlassen               | gar nicht | ein wenig | mäßig | stark | sehr stark |
| Schmerzen im Unterbauch             | gar nicht | ein wenig | mäßig | stark | sehr stark |

Wie stark fühlen Sie sich heute durch Ihre Beschwerden beeinträchtigt?

|                                           | 0         | 1         | 2     | 3     | 4          |
|-------------------------------------------|-----------|-----------|-------|-------|------------|
| Durch Harndrang                           | gar nicht | ein wenig | mäßig | stark | sehr stark |
| Durch Brennen/Schmerzen beim Wasserlassen | gar nicht | ein wenig | mäßig | stark | sehr stark |
| Durch häufiges Wasserlassen               | gar nicht | ein wenig | mäßig | stark | sehr stark |
| Durch Schmerzen im Unterbauch             | gar nicht | ein wenig | mäßig | stark | sehr stark |

weiter
